# Supplementary material for: Urban aerosol chemistry at a land–water transition site during summer – Part 1: Impact of agricultural and industrial ammonia emissions
Source: Copernicus journal article supplement (doi:10.5194/acp-21-13051-2021), 2021-09-02
Supplement: Supplementary file 1 [file acp-21-13051-2021-supplement.pdf]

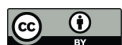

*Supplement of*

## **Urban aerosol chemistry at a land–water transition site during summer – Part 1: Impact of agricultural and industrial ammonia emissions**

**Nicholas Balasus et al.**

*Correspondence to:* Christopher J. Hennigan ([hennigan@umbc.edu](mailto:hennigan@umbc.edu))

The copyright of individual parts of the supplement might differ from the article licence.

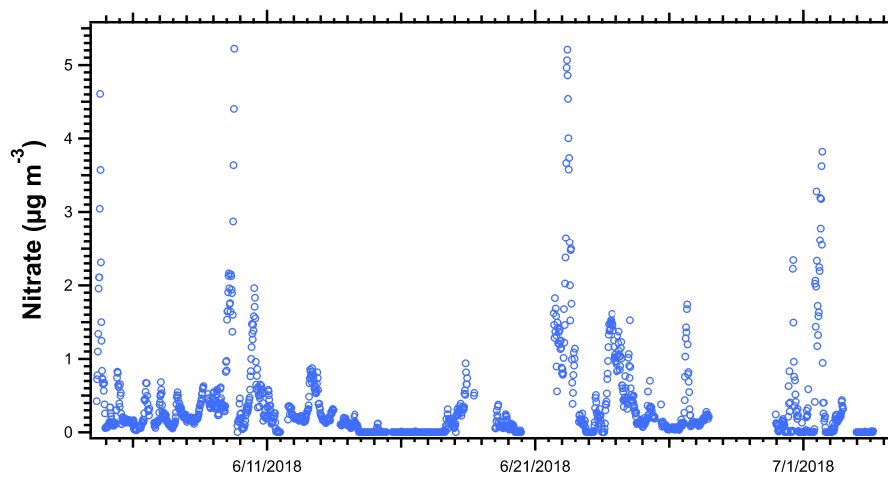

**Figure S1.** Time series of aerosol  $\text{NO}_3^-$  for the duration of the OWLETS-2 campaign.

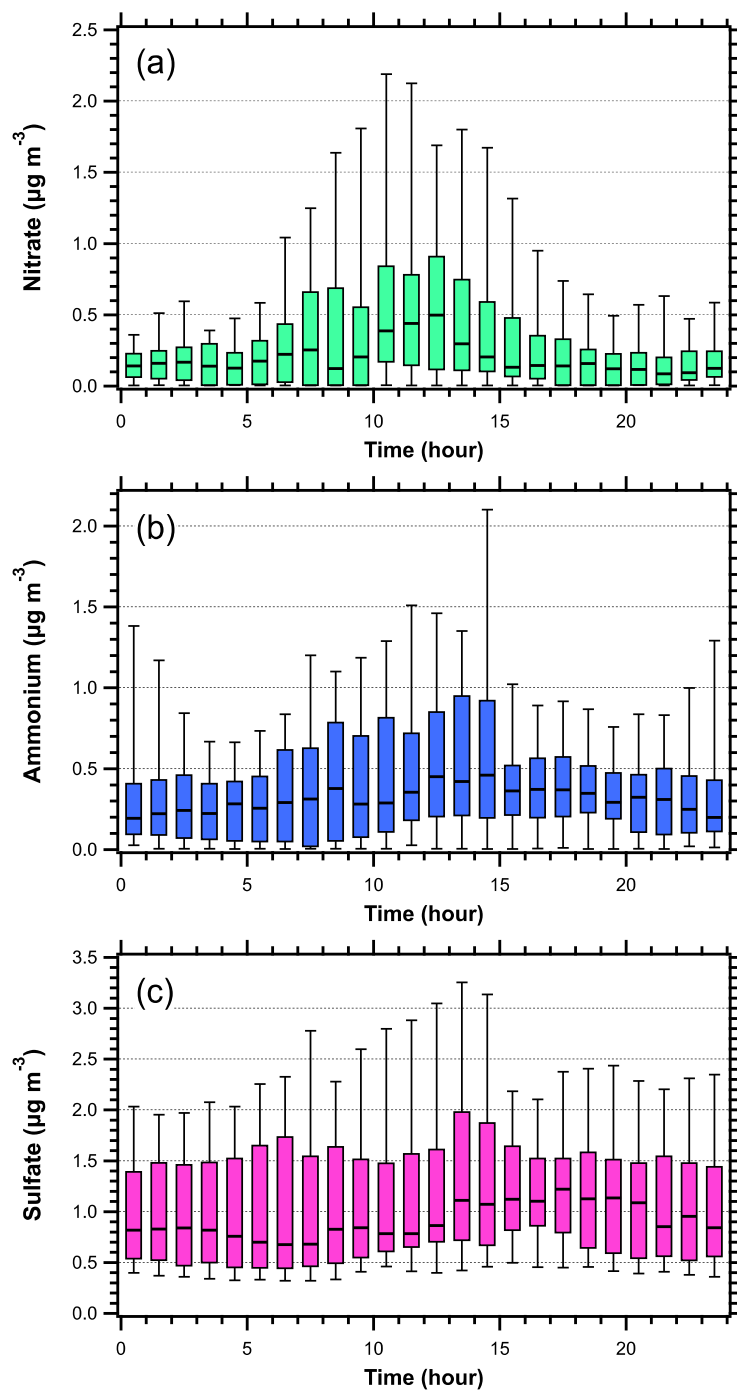

**Figure S2.** Diurnal profile of aerosol nitrate, ammonium, and sulfate on local time (EDT). The 10<sup>th</sup>, 25<sup>th</sup>, 50<sup>th</sup>, 75<sup>th</sup>, and 90<sup>th</sup> percentiles are marked.

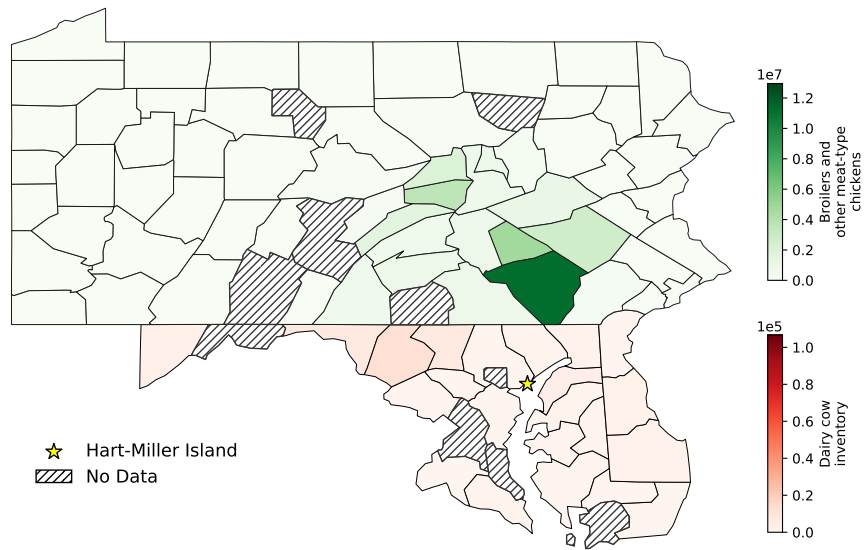

**Figure S3.** Inventories of dairy cows in Maryland and Delaware and broiler and other meat-type chickens in Pennsylvania. Data are from the 2017 Census of Agriculture (USDA, 2017).

## References

USDA: Census of Agriculture, Volume 1, Chapter 2: County Level Data, Tech. rep., 2017.
